# Supplementary material for: Synthesis and biological evaluation of thiolate gold(i) complexes as thioredoxin reductase (TrxR) and glutathione reductase (GR) inhibitors
Source: Royal Society of Chemistry journal article supplement (doi:10.1039/c9nj02502b), 2019-01-01
Supplement: c9nj02502b1.pdf [file c9nj02502b1.pdf]

## Electronic Supplementary Information

### Synthesis and biological evaluation of thiolate gold(I) complexes as thioredoxin reductases (TrxRs) and glutathione reductase (GR) inhibitors

*Masood Fereidoonzhad,<sup>a,d</sup> Hasti Ahmadi Mirsadeghi,<sup>b</sup> Sedigheh Abedanzadeh,<sup>c</sup> Alireza Yazdani,<sup>a,d</sup> Arsalan Alamdarlou,<sup>a,d</sup> Mojgan Babaghasabha,<sup>b</sup> Zainab Almansaf,<sup>e</sup> Zeinab Faghieh,<sup>f</sup> Zach McConnell,<sup>e</sup> Hamid R. Shahsavari,<sup>\*b,e,l</sup> and M. Hassan Beyzavi<sup>\*e</sup>*

<sup>a</sup>Toxicology Research Center; Department of Medicinal Chemistry, School of Pharmacy, Ahvaz Jundishapur University of Medical Sciences, Ahvaz, Iran.

<sup>b</sup>Department of Chemistry, Institute for Advanced Studies in Basic Sciences (IASBS), Zanjan 45137-66731, Iran.

<sup>c</sup>Institute of Biochemistry and Biophysics (IBB), University of Tehran, Tehran, Iran.

<sup>d</sup>Student Research Committee, Ahvaz Jundishapur University of Medical Sciences, Ahvaz, Iran.

<sup>e</sup>Department of Chemistry and Biochemistry, University of Arkansas, Fayetteville, Arkansas 72701, United States.

<sup>f</sup>Pharmaceutical Sciences Research Center, Shiraz University of Medical Sciences, Shiraz, Iran.

<sup>l</sup>On sabbatical leave from IASBS, Zanjan, Iran.

\*Email: [shahsavari@iasbs.ac.ir](mailto:shahsavari@iasbs.ac.ir), [hrshahsa@uark.edu](mailto:hrshahsa@uark.edu) (H.R.S.), [beyzavi@uark.edu](mailto:beyzavi@uark.edu). (M.H.B.).

**Table S1.** One-way ANOVA statistical analysis on the IC<sub>50</sub> data of A549 cell line.

| Ordinary one-way ANOVA<br>Multiple comparisons |                                   |            |                    |              |         |                  |     |
|------------------------------------------------|-----------------------------------|------------|--------------------|--------------|---------|------------------|-----|
| 5                                              | Tukey's multiple comparisons test | Mean Diff. | 95.00% CI of diff. | Significant? | Summary | Adjusted P Value |     |
| 6                                              | A vs. 1a                          | 9.370      | 5.336 to 13.40     | Yes          | ****    | <0.0001          | A-B |
| 7                                              | A vs. 1b                          | 14.41      | 10.38 to 18.44     | Yes          | ****    | <0.0001          | A-C |
| 8                                              | A vs. 1c                          | 7.600      | 3.566 to 11.63     | Yes          | ***     | 0.0002           | A-D |
| 9                                              | A vs. 1d                          | 3.990      | -0.04365 to 8.024  | No           | ns      | 0.0534           | A-E |
| 10                                             | A vs. Cisplatin                   | 16.76      | 12.73 to 20.79     | Yes          | ****    | <0.0001          | A-F |
| 11                                             | A vs. Auranofin                   | 15.59      | 11.56 to 19.62     | Yes          | ****    | <0.0001          | A-G |
| 12                                             | 1a vs. 1b                         | 5.040      | 1.006 to 9.074     | Yes          | *       | 0.0107           | B-C |
| 13                                             | 1a vs. 1c                         | -1.770     | -5.804 to 2.264    | No           | ns      | 0.7417           | B-D |
| 14                                             | 1a vs. 1d                         | -5.380     | -9.414 to -1.346   | Yes          | **      | 0.0063           | B-E |
| 15                                             | 1a vs. Cisplatin                  | 7.390      | 3.356 to 11.42     | Yes          | ***     | 0.0003           | B-F |
| 16                                             | 1a vs. Auranofin                  | 6.220      | 2.186 to 10.25     | Yes          | **      | 0.0018           | B-G |
| 17                                             | 1b vs. 1c                         | -6.810     | -10.84 to -2.776   | Yes          | ***     | 0.0007           | C-D |
| 18                                             | 1b vs. 1d                         | -10.42     | -14.45 to -6.386   | Yes          | ****    | <0.0001          | C-E |
| 19                                             | 1b vs. Cisplatin                  | 2.350      | -1.684 to 6.384    | No           | ns      | 0.4611           | C-F |
| 20                                             | 1b vs. Auranofin                  | 1.180      | -2.854 to 5.214    | No           | ns      | 0.9460           | C-G |
| 21                                             | 1c vs. 1d                         | -3.610     | -7.644 to 0.4236   | No           | ns      | 0.0936           | D-E |
| 22                                             | 1c vs. Cisplatin                  | 9.160      | 5.126 to 13.19     | Yes          | ****    | <0.0001          | D-F |
| 23                                             | 1c vs. Auranofin                  | 7.990      | 3.956 to 12.02     | Yes          | ***     | 0.0001           | D-G |
| 24                                             | 1d vs. Cisplatin                  | 12.77      | 8.736 to 16.80     | Yes          | ****    | <0.0001          | E-F |
| 25                                             | 1d vs. Auranofin                  | 11.60      | 7.566 to 15.63     | Yes          | ****    | <0.0001          | E-G |
| 26                                             | Cisplatin vs. Auranofin           | -1.170     | -5.204 to 2.864    | No           | ns      | 0.9480           | F-G |

**Table S2.** One-way ANOVA statistical analysis on the IC<sub>50</sub> data of SKOV3 cell line.

| Ordinary one-way ANOVA<br>Multiple comparisons |                                   |            |                    |              |         |                  |     |
|------------------------------------------------|-----------------------------------|------------|--------------------|--------------|---------|------------------|-----|
| 5                                              | Tukey's multiple comparisons test | Mean Diff. | 95.00% CI of diff. | Significant? | Summary | Adjusted P Value |     |
| 6                                              | A vs. 1a                          | 9.300      | 6.653 to 11.95     | Yes          | ****    | <0.0001          | A-B |
| 7                                              | A vs. 1b                          | 9.730      | 7.083 to 12.38     | Yes          | ****    | <0.0001          | A-C |
| 8                                              | A vs. 1c                          | 1.940      | -0.7067 to 4.587   | No           | ns      | 0.2295           | A-D |
| 9                                              | A vs. 1d                          | 1.780      | -0.8667 to 4.427   | No           | ns      | 0.3099           | A-E |
| 10                                             | A vs. Cisplatin                   | 2.860      | 0.2133 to 5.507    | Yes          | *       | 0.0305           | A-F |
| 11                                             | A vs. Auranofin                   | 10.87      | 8.223 to 13.52     | Yes          | ****    | <0.0001          | A-G |
| 12                                             | 1a vs. 1b                         | 0.4300     | -2.217 to 3.077    | No           | ns      | 0.9972           | B-C |
| 13                                             | 1a vs. 1c                         | -7.360     | -10.01 to -4.713   | Yes          | ****    | <0.0001          | B-D |
| 14                                             | 1a vs. 1d                         | -7.520     | -10.17 to -4.873   | Yes          | ****    | <0.0001          | B-E |
| 15                                             | 1a vs. Cisplatin                  | -6.440     | -9.087 to -3.793   | Yes          | ****    | <0.0001          | B-F |
| 16                                             | 1a vs. Auranofin                  | 1.570      | -1.077 to 4.217    | No           | ns      | 0.4415           | B-G |
| 17                                             | 1b vs. 1c                         | -7.790     | -10.44 to -5.143   | Yes          | ****    | <0.0001          | C-D |
| 18                                             | 1b vs. 1d                         | -7.950     | -10.60 to -5.303   | Yes          | ****    | <0.0001          | C-E |
| 19                                             | 1b vs. Cisplatin                  | -6.870     | -9.517 to -4.223   | Yes          | ****    | <0.0001          | C-F |
| 20                                             | 1b vs. Auranofin                  | 1.140      | -1.507 to 3.787    | No           | ns      | 0.7566           | C-G |
| 21                                             | 1c vs. 1d                         | -0.1600    | -2.807 to 2.487    | No           | ns      | >0.9999          | D-E |
| 22                                             | 1c vs. Cisplatin                  | 0.9200     | -1.727 to 3.567    | No           | ns      | 0.8880           | D-F |
| 23                                             | 1c vs. Auranofin                  | 8.930      | 6.283 to 11.58     | Yes          | ****    | <0.0001          | D-G |
| 24                                             | 1d vs. Cisplatin                  | 1.080      | -1.567 to 3.727    | No           | ns      | 0.7968           | E-F |
| 25                                             | 1d vs. Auranofin                  | 9.090      | 6.443 to 11.74     | Yes          | ****    | <0.0001          | E-G |
| 26                                             | Cisplatin vs. Auranofin           | 8.010      | 5.363 to 10.66     | Yes          | ****    | <0.0001          | F-G |

**Table S3.** One-way ANOVA statistical analysis on the IC<sub>50</sub> data of MCF-7 cell line.

| Ordinary one-way ANOVA<br>Multiple comparisons |                                   |            |                    |              |         |                  |     |
|------------------------------------------------|-----------------------------------|------------|--------------------|--------------|---------|------------------|-----|
|                                                |                                   | Mean Diff. | 95.00% CI of diff. | Significant? | Summary | Adjusted P Value |     |
| 5                                              | Tukey's multiple comparisons test |            |                    |              |         |                  |     |
| 6                                              | Avs. 1a                           | 5.330      | 2.696 to 7.964     | Yes          | ***     | 0.0001           | A-B |
| 7                                              | Avs. 1b                           | 7.190      | 4.556 to 9.824     | Yes          | ****    | <0.0001          | A-C |
| 8                                              | Avs. 1c                           | 6.510      | 3.876 to 9.144     | Yes          | ****    | <0.0001          | A-D |
| 9                                              | Avs. 1d                           | 4.640      | 2.006 to 7.274     | Yes          | ***     | 0.0005           | A-E |
| 10                                             | Avs. cisplatin                    | 2.050      | -0.5845 to 4.684   | No           | ns      | 0.1809           | A-F |
| 11                                             | Avs. Auranofin                    | 6.360      | 3.726 to 8.994     | Yes          | ****    | <0.0001          | A-G |
| 12                                             | 1a vs. 1b                         | 1.860      | -0.7745 to 4.494   | No           | ns      | 0.2632           | B-C |
| 13                                             | 1a vs. 1c                         | 1.180      | -1.454 to 3.814    | No           | ns      | 0.7246           | B-D |
| 14                                             | 1a vs. 1d                         | -0.6900    | -3.324 to 1.944    | No           | ns      | 0.9676           | B-E |
| 15                                             | 1a vs. cisplatin                  | -3.280     | -5.914 to -0.6455  | Yes          | *       | 0.0110           | B-F |
| 16                                             | 1a vs. Auranofin                  | 1.030      | -1.604 to 3.664    | No           | ns      | 0.8251           | B-G |
| 17                                             | 1b vs. 1c                         | -0.6800    | -3.314 to 1.954    | No           | ns      | 0.9697           | C-D |
| 18                                             | 1b vs. 1d                         | -2.550     | -5.184 to 0.08447  | No           | ns      | 0.0607           | C-E |
| 19                                             | 1b vs. cisplatin                  | -5.140     | -7.774 to -2.506   | Yes          | ***     | 0.0002           | C-F |
| 20                                             | 1b vs. Auranofin                  | -0.8300    | -3.464 to 1.804    | No           | ns      | 0.9253           | C-G |
| 21                                             | 1c vs. 1d                         | -1.870     | -4.504 to 0.7645   | No           | ns      | 0.2582           | D-E |
| 22                                             | 1c vs. cisplatin                  | -4.460     | -7.094 to -1.826   | Yes          | ***     | 0.0007           | D-F |
| 23                                             | 1c vs. Auranofin                  | -0.1500    | -2.784 to 2.484    | No           | ns      | >0.9999          | D-G |
| 24                                             | 1d vs. cisplatin                  | -2.590     | -5.224 to 0.04447  | No           | ns      | 0.0554           | E-F |
| 25                                             | 1d vs. Auranofin                  | 1.720      | -0.9145 to 4.354   | No           | ns      | 0.3398           | E-G |
| 26                                             | cisplatin vs. Auranofin           | 4.310      | 1.676 to 6.944     | Yes          | **      | 0.0010           | F-G |

**Table S4.** One-way ANOVA statistical analysis on the IC<sub>50</sub> data of Hela cell line.

| Ordinary one-way ANOVA<br>Multiple comparisons |                                   |            |                    |              |         |                  |     |
|------------------------------------------------|-----------------------------------|------------|--------------------|--------------|---------|------------------|-----|
|                                                |                                   | Mean Diff. | 95.00% CI of diff. | Significant? | Summary | Adjusted P Value |     |
| 5                                              | Tukey's multiple comparisons test |            |                    |              |         |                  |     |
| 6                                              | A vs. 1a                          | 6.020      | 3.958 to 8.082     | Yes          | ****    | <0.0001          | A-B |
| 7                                              | A vs. 1b                          | 8.920      | 6.858 to 10.98     | Yes          | ****    | <0.0001          | A-C |
| 8                                              | A vs. 1c                          | 6.040      | 3.978 to 8.102     | Yes          | ****    | <0.0001          | A-D |
| 9                                              | A vs. 1d                          | 2.700      | 0.6379 to 4.762    | Yes          | **      | 0.0074           | A-E |
| 10                                             | A vs. Cisplatin                   | -21.26     | -23.32 to -19.20   | Yes          | ****    | <0.0001          | A-F |
| 11                                             | A vs. Auranofin                   | 8.990      | 6.928 to 11.05     | Yes          | ****    | <0.0001          | A-G |
| 12                                             | 1a vs. 1b                         | 2.900      | 0.8379 to 4.962    | Yes          | **      | 0.0040           | B-C |
| 13                                             | 1a vs. 1c                         | 0.02000    | -2.042 to 2.082    | No           | ns      | >0.9999          | B-D |
| 14                                             | 1a vs. 1d                         | -3.320     | -5.382 to -1.258   | Yes          | **      | 0.0012           | B-E |
| 15                                             | 1a vs. Cisplatin                  | -27.28     | -29.34 to -25.22   | Yes          | ****    | <0.0001          | B-F |
| 16                                             | 1a vs. Auranofin                  | 2.970      | 0.9079 to 5.032    | Yes          | **      | 0.0033           | B-G |
| 17                                             | 1b vs. 1c                         | -2.880     | -4.942 to -0.8179  | Yes          | **      | 0.0043           | C-D |
| 18                                             | 1b vs. 1d                         | -6.220     | -8.282 to -4.158   | Yes          | ****    | <0.0001          | C-E |
| 19                                             | 1b vs. Cisplatin                  | -30.18     | -32.24 to -28.12   | Yes          | ****    | <0.0001          | C-F |
| 20                                             | 1b vs. Auranofin                  | 0.07000    | -1.992 to 2.132    | No           | ns      | >0.9999          | C-G |
| 21                                             | 1c vs. 1d                         | -3.340     | -5.402 to -1.278   | Yes          | **      | 0.0011           | D-E |
| 22                                             | 1c vs. Cisplatin                  | -27.30     | -29.36 to -25.24   | Yes          | ****    | <0.0001          | D-F |
| 23                                             | 1c vs. Auranofin                  | 2.950      | 0.8879 to 5.012    | Yes          | **      | 0.0035           | D-G |
| 24                                             | 1d vs. Cisplatin                  | -23.96     | -26.02 to -21.90   | Yes          | ****    | <0.0001          | E-F |
| 25                                             | 1d vs. Auranofin                  | 6.290      | 4.228 to 8.352     | Yes          | ****    | <0.0001          | E-G |
| 26                                             | Cisplatin vs. Auranofin           | 30.25      | 28.19 to 32.31     | Yes          | ****    | <0.0001          | F-G |



**Table S5.** One-way ANOVA statistical analysis on the IC<sub>50</sub> data of SW1116 cell line.

| Ordinary one-way ANOVA<br>Multiple comparisons |                                   |            |                    |              |         |                  |     |
|------------------------------------------------|-----------------------------------|------------|--------------------|--------------|---------|------------------|-----|
| ▲                                              |                                   |            |                    |              |         |                  |     |
| 5                                              | Tukey's multiple comparisons test | Mean Diff. | 95.00% CI of diff. | Significant? | Summary | Adjusted P Value |     |
| 6                                              | Avs. 1a                           | 8.130      | 5.692 to 10.57     | Yes          | ****    | <0.0001          | A-B |
| 7                                              | Avs. 1b                           | 11.88      | 9.442 to 14.32     | Yes          | ****    | <0.0001          | A-C |
| 8                                              | Avs. 1c                           | 5.380      | 2.942 to 7.818     | Yes          | ****    | <0.0001          | A-D |
| 9                                              | Avs. 1d                           | 2.980      | 0.5423 to 5.418    | Yes          | *       | 0.0126           | A-E |
| 10                                             | Avs. cisplatin                    | -26.50     | -28.94 to -24.06   | Yes          | ****    | <0.0001          | A-F |
| 11                                             | Avs. Auranofin                    | 10.99      | 8.552 to 13.43     | Yes          | ****    | <0.0001          | A-G |
| 12                                             | 1a vs. 1b                         | 3.750      | 1.312 to 6.188     | Yes          | **      | 0.0018           | B-C |
| 13                                             | 1a vs. 1c                         | -2.750     | -5.188 to -0.3123  | Yes          | *       | 0.0227           | B-D |
| 14                                             | 1a vs. 1d                         | -5.150     | -7.588 to -2.712   | Yes          | ****    | <0.0001          | B-E |
| 15                                             | 1a vs. cisplatin                  | -34.63     | -37.07 to -32.19   | Yes          | ****    | <0.0001          | B-F |
| 16                                             | 1a vs. Auranofin                  | 2.860      | 0.4223 to 5.298    | Yes          | *       | 0.0172           | B-G |
| 17                                             | 1b vs. 1c                         | -6.500     | -8.938 to -4.062   | Yes          | ****    | <0.0001          | C-D |
| 18                                             | 1b vs. 1d                         | -8.900     | -11.34 to -6.462   | Yes          | ****    | <0.0001          | C-E |
| 19                                             | 1b vs. cisplatin                  | -38.38     | -40.82 to -35.94   | Yes          | ****    | <0.0001          | C-F |
| 20                                             | 1b vs. Auranofin                  | -0.8900    | -3.328 to 1.548    | No           | ns      | 0.8643           | C-G |
| 21                                             | 1c vs. 1d                         | -2.400     | -4.838 to 0.03773  | No           | ns      | 0.0549           | D-E |
| 22                                             | 1c vs. cisplatin                  | -31.88     | -34.32 to -29.44   | Yes          | ****    | <0.0001          | D-F |
| 23                                             | 1c vs. Auranofin                  | 5.610      | 3.172 to 8.048     | Yes          | ****    | <0.0001          | D-G |
| 24                                             | 1d vs. cisplatin                  | -29.48     | -31.92 to -27.04   | Yes          | ****    | <0.0001          | E-F |
| 25                                             | 1d vs. Auranofin                  | 8.010      | 5.572 to 10.45     | Yes          | ****    | <0.0001          | E-G |
| 26                                             | cisplatin vs. Auranofin           | 37.49      | 35.05 to 39.93     | Yes          | ****    | <0.0001          | F-G |

**Table S6.** One-way ANOVA statistical analysis on the IC<sub>50</sub> data of MCF-12A cell line.

| Ordinary one-way ANOVA<br>Multiple comparisons |                                   |            |                    |              |         |                  |     |
|------------------------------------------------|-----------------------------------|------------|--------------------|--------------|---------|------------------|-----|
| ▲                                              |                                   |            |                    |              |         |                  |     |
| 5                                              | Tukey's multiple comparisons test | Mean Diff. | 95.00% CI of diff. | Significant? | Summary | Adjusted P Value |     |
| 6                                              | Avs. 1a                           | 30.66      | 26.04 to 35.28     | Yes          | ****    | <0.0001          | A-B |
| 7                                              | Avs. 1b                           | 44.14      | 39.52 to 48.76     | Yes          | ****    | <0.0001          | A-C |
| 8                                              | Avs. 1c                           | 25.78      | 21.16 to 30.40     | Yes          | ****    | <0.0001          | A-D |
| 9                                              | Avs. 1d                           | 36.94      | 32.32 to 41.56     | Yes          | ****    | <0.0001          | A-E |
| 10                                             | Avs. cisplatin                    | 56.70      | 52.08 to 61.32     | Yes          | ****    | <0.0001          | A-F |
| 11                                             | Avs. Auranofin                    | 40.17      | 35.55 to 44.79     | Yes          | ****    | <0.0001          | A-G |
| 12                                             | 1a vs. 1b                         | 13.48      | 8.862 to 18.10     | Yes          | ****    | <0.0001          | B-C |
| 13                                             | 1a vs. 1c                         | -4.880     | -9.498 to -0.2621  | Yes          | *       | 0.0353           | B-D |
| 14                                             | 1a vs. 1d                         | 6.280      | 1.662 to 10.90     | Yes          | **      | 0.0054           | B-E |
| 15                                             | 1a vs. cisplatin                  | 26.04      | 21.42 to 30.66     | Yes          | ****    | <0.0001          | B-F |
| 16                                             | 1a vs. Auranofin                  | 9.510      | 4.892 to 14.13     | Yes          | ****    | <0.0001          | B-G |
| 17                                             | 1b vs. 1c                         | -18.36     | -22.98 to -13.74   | Yes          | ****    | <0.0001          | C-D |
| 18                                             | 1b vs. 1d                         | -7.200     | -11.82 to -2.582   | Yes          | **      | 0.0016           | C-E |
| 19                                             | 1b vs. cisplatin                  | 12.56      | 7.942 to 17.18     | Yes          | ****    | <0.0001          | C-F |
| 20                                             | 1b vs. Auranofin                  | -3.970     | -8.588 to 0.6479   | No           | ns      | 0.1148           | C-G |
| 21                                             | 1c vs. 1d                         | 11.16      | 6.542 to 15.78     | Yes          | ****    | <0.0001          | D-E |
| 22                                             | 1c vs. cisplatin                  | 30.92      | 26.30 to 35.54     | Yes          | ****    | <0.0001          | D-F |
| 23                                             | 1c vs. Auranofin                  | 14.39      | 9.772 to 19.01     | Yes          | ****    | <0.0001          | D-G |
| 24                                             | 1d vs. cisplatin                  | 19.76      | 15.14 to 24.38     | Yes          | ****    | <0.0001          | E-F |
| 25                                             | 1d vs. Auranofin                  | 3.230      | -1.388 to 7.848    | No           | ns      | 0.2719           | E-G |
| 26                                             | cisplatin vs. Auranofin           | -16.53     | -21.15 to -11.91   | Yes          | ****    | <0.0001          | F-G |
